# Supplementary material for: The intriguing dual-directing effect of 2-cyanobenzyl ether for a highly stereospecific glycosylation reaction
Source: Springer Nature journal article supplement (doi:10.1038/ncomms6051), 2014-10-03
Supplement: 41467_2014_BFncomms6051_MOESM17_ESM.mol [file 41467_2014_BFncomms6051_MOESM17_ESM.mol]

  ChemDraw09191408362D

 21 23  0  0  0  0  0  0  0  0999 V2000
    0.6688    0.1346    0.0000 O   0  0  0  0  0  0  0  0  0  0  0  0
   -0.0423   -0.2837    0.0000 C   0  0  0  0  0  0  0  0  0  0  0  0
   -0.7601    0.1231    0.0000 O   0  0  0  0  0  0  0  0  0  0  0  0
   -0.7668    0.9480    0.0000 C   0  0  0  0  0  0  0  0  0  0  0  0
   -1.5129    1.3000    0.0000 C   0  0  0  0  0  0  0  0  0  0  0  0
   -2.1538    0.7804    0.0000 O   0  0  0  0  0  0  0  0  0  0  0  0
   -1.7030    2.1028    0.0000 C   0  0  0  0  0  0  0  0  0  0  0  0
   -1.1938    2.7519    0.0000 C   0  0  0  0  0  0  0  0  0  0  0  0
   -0.3689    2.7586    0.0000 O   0  0  0  0  0  0  0  0  0  0  0  0
   -0.7719    1.5773    0.0000 O   0  0  0  0  0  0  0  0  0  0  0  0
    0.1507    2.1177    0.0000 C   0  0  0  0  0  0  0  0  0  0  0  0
   -0.0264    1.3120    0.0000 C   0  0  0  0  0  0  0  0  0  0  0  0
    0.6227    0.8028    0.0000 N   0  0  0  0  0  0  0  0  0  0  0  0
    1.3883    1.1104    0.0000 N   0  3  0  0  0  0  0  0  0  0  0  0
    2.1538    1.4180    0.0000 N   0  5  0  0  0  0  0  0  0  0  0  0
   -0.0357   -1.1086    0.0000 C   0  0  0  0  0  0  0  0  0  0  0  0
    0.6821   -1.5154    0.0000 C   0  0  0  0  0  0  0  0  0  0  0  0
    0.6887   -2.3403    0.0000 C   0  0  0  0  0  0  0  0  0  0  0  0
   -0.0224   -2.7586    0.0000 C   0  0  0  0  0  0  0  0  0  0  0  0
   -0.7402   -2.3519    0.0000 C   0  0  0  0  0  0  0  0  0  0  0  0
   -0.7468   -1.5269    0.0000 C   0  0  0  0  0  0  0  0  0  0  0  0
  1  2  2  0      
  2  3  1  0      
  4  3  1  1      
  4  5  1  0      
  5  6  1  6      
  5  7  1  0      
  7  8  1  0      
  8  9  1  0      
  7 10  1  6      
 11 10  1  6      
  9 11  1  0      
 11 12  1  0      
  4 12  1  0      
 12 13  1  6      
 13 14  2  0      
 14 15  2  0      
  2 16  1  0      
 16 17  2  0      
 17 18  1  0      
 18 19  2  0      
 19 20  1  0      
 20 21  2  0      
 16 21  1  0      
M  CHG  2  14   1  15  -1
M  END
