# Supplementary material for: The intriguing dual-directing effect of 2-cyanobenzyl ether for a highly stereospecific glycosylation reaction
Source: Springer Nature journal article supplement (doi:10.1038/ncomms6051), 2014-10-03
Supplement: 41467_2014_BFncomms6051_MOESM61_ESM.mol [file 41467_2014_BFncomms6051_MOESM61_ESM.mol]

  ChemDraw09191408362D

 36 37  0  0  0  0  0  0  0  0999 V2000
   -2.5006    0.8250    0.0000 O   0  0  0  0  0  0  0  0  0  0  0  0
   -2.5006    0.0000    0.0000 C   0  0  0  0  0  0  0  0  0  0  0  0
   -1.7862   -0.4125    0.0000 O   0  0  0  0  0  0  0  0  0  0  0  0
   -1.0717    0.0000    0.0000 C   0  0  0  0  0  0  0  0  0  0  0  0
   -0.3572   -0.4125    0.0000 C   0  0  0  0  0  0  0  0  0  0  0  0
   -0.3572   -1.2375    0.0000 O   0  0  0  0  0  0  0  0  0  0  0  0
   -1.0717   -1.6500    0.0000 C   0  0  0  0  0  0  0  0  0  0  0  0
   -1.7862   -1.2375    0.0000 C   0  0  0  0  0  0  0  0  0  0  0  0
   -1.0717   -2.4750    0.0000 O   0  0  0  0  0  0  0  0  0  0  0  0
    0.3572    0.0000    0.0000 C   0  0  0  0  0  0  0  0  0  0  0  0
    1.0717   -0.4125    0.0000 O   0  0  0  0  0  0  0  0  0  0  0  0
    1.0717   -1.2375    0.0000 C   0  0  0  0  0  0  0  0  0  0  0  0
    1.7862   -1.6500    0.0000 C   0  0  0  0  0  0  0  0  0  0  0  0
    1.7862   -2.4750    0.0000 C   0  0  0  0  0  0  0  0  0  0  0  0
    1.0717   -2.8875    0.0000 C   0  0  0  0  0  0  0  0  0  0  0  0
    0.3572   -3.3000    0.0000 N   0  0  0  0  0  0  0  0  0  0  0  0
    2.5006   -2.8875    0.0000 C   0  0  0  0  0  0  0  0  0  0  0  0
    3.2151   -2.4750    0.0000 C   0  0  0  0  0  0  0  0  0  0  0  0
    3.2151   -1.6500    0.0000 C   0  0  0  0  0  0  0  0  0  0  0  0
    2.5006   -1.2375    0.0000 C   0  0  0  0  0  0  0  0  0  0  0  0
    0.3572    0.8250    0.0000 C   0  0  0  0  0  0  0  0  0  0  0  0
    1.0717    1.2375    0.0000 O   0  0  0  0  0  0  0  0  0  0  0  0
    1.7862    0.8250    0.0000 C   0  0  0  0  0  0  0  0  0  0  0  0
    2.5006    1.2375    0.0000 C   0  0  0  0  0  0  0  0  0  0  0  0
    3.2151    1.6500    0.0000 Cl  0  0  0  0  0  0  0  0  0  0  0  0
    2.5006    2.0625    0.0000 Cl  0  0  0  0  0  0  0  0  0  0  0  0
    3.2151    0.8250    0.0000 Cl  0  0  0  0  0  0  0  0  0  0  0  0
    1.7862    0.0000    0.0000 N   0  0  0  0  0  0  0  0  0  0  0  0
   -0.3572    1.2375    0.0000 O   0  0  0  0  0  0  0  0  0  0  0  0
   -1.0717    0.8250    0.0000 C   0  0  0  0  0  0  0  0  0  0  0  0
   -1.7862    1.2375    0.0000 C   0  0  0  0  0  0  0  0  0  0  0  0
   -1.7862    2.0625    0.0000 O   0  0  0  0  0  0  0  0  0  0  0  0
   -2.5006    2.4750    0.0000 C   0  0  0  0  0  0  0  0  0  0  0  0
   -3.2151    2.0625    0.0000 C   0  0  0  0  0  0  0  0  0  0  0  0
   -2.5006    3.3000    0.0000 O   0  0  0  0  0  0  0  0  0  0  0  0
   -3.2151   -0.4125    0.0000 C   0  0  0  0  0  0  0  0  0  0  0  0
  1  2  2  0      
  2  3  1  0      
  4  3  1  6      
  4  5  1  0      
  5  6  1  1      
  6  7  1  0      
  7  8  1  0      
  7  9  2  0      
  5 10  1  0      
 10 11  1  6      
 11 12  1  0      
 12 13  1  0      
 13 14  2  0      
 14 15  1  0      
 15 16  3  0      
 14 17  1  0      
 17 18  2  0      
 18 19  1  0      
 19 20  2  0      
 13 20  1  0      
 10 21  1  0      
 21 22  1  6      
 22 23  1  0      
 23 24  1  0      
 24 25  1  0      
 24 26  1  0      
 24 27  1  0      
 23 28  2  0      
 21 29  1  0      
 29 30  1  0      
  4 30  1  0      
 30 31  1  1      
 31 32  1  0      
 32 33  1  0      
 33 34  1  0      
 33 35  2  0      
  2 36  1  0      
M  END
