# Supplementary material for: The intriguing dual-directing effect of 2-cyanobenzyl ether for a highly stereospecific glycosylation reaction
Source: Springer Nature journal article supplement (doi:10.1038/ncomms6051), 2014-10-03
Supplement: 41467_2014_BFncomms6051_MOESM71_ESM.mol [file 41467_2014_BFncomms6051_MOESM71_ESM.mol]

  ChemDraw09191408362D

 47 51  0  0  0  0  0  0  0  0999 V2000
   -1.2246   -3.3748    0.0000 C   0  0  0  0  0  0  0  0  0  0  0  0
   -1.2303   -2.5498    0.0000 C   0  0  0  0  0  0  0  0  0  0  0  0
   -1.9419   -2.9672    0.0000 C   0  0  0  0  0  0  0  0  0  0  0  0
   -1.5711   -1.7985    0.0000 O   0  0  0  0  0  0  0  0  0  0  0  0
   -0.9618   -1.2422    0.0000 C   0  0  0  0  0  0  0  0  0  0  0  0
   -0.2445   -1.6498    0.0000 C   0  0  0  0  0  0  0  0  0  0  0  0
   -0.4105   -2.4579    0.0000 O   0  0  0  0  0  0  0  0  0  0  0  0
    0.4671   -1.2323    0.0000 C   0  0  0  0  0  0  0  0  0  0  0  0
    1.1844   -1.6399    0.0000 O   0  0  0  0  0  0  0  0  0  0  0  0
    1.8960   -1.2225    0.0000 C   0  0  0  0  0  0  0  0  0  0  0  0
    2.6133   -1.6300    0.0000 C   0  0  0  0  0  0  0  0  0  0  0  0
    3.3249   -1.2126    0.0000 C   0  0  0  0  0  0  0  0  0  0  0  0
    4.0422   -1.6202    0.0000 C   0  0  0  0  0  0  0  0  0  0  0  0
    4.0479   -2.4451    0.0000 C   0  0  0  0  0  0  0  0  0  0  0  0
    3.3363   -2.8626    0.0000 C   0  0  0  0  0  0  0  0  0  0  0  0
    2.6190   -2.4550    0.0000 C   0  0  0  0  0  0  0  0  0  0  0  0
    1.9074   -2.8724    0.0000 C   0  0  0  0  0  0  0  0  0  0  0  0
    1.1958   -3.2899    0.0000 N   0  0  0  0  0  0  0  0  0  0  0  0
    0.4614   -0.4074    0.0000 C   0  0  0  0  0  0  0  0  0  0  0  0
    1.1730    0.0101    0.0000 O   0  0  0  0  0  0  0  0  0  0  0  0
    1.1673    0.8350    0.0000 C   0  0  0  0  0  0  0  0  0  0  0  0
    1.8789    1.2525    0.0000 C   0  0  0  0  0  0  0  0  0  0  0  0
    2.5962    0.8449    0.0000 Cl  0  0  0  0  0  0  0  0  0  0  0  0
    2.5905    1.6699    0.0000 Cl  0  0  0  0  0  0  0  0  0  0  0  0
    1.8732    2.0774    0.0000 Cl  0  0  0  0  0  0  0  0  0  0  0  0
    0.4500    1.2426    0.0000 N   0  0  0  0  0  0  0  0  0  0  0  0
   -0.2559    0.0002    0.0000 O   0  0  0  0  0  0  0  0  0  0  0  0
   -0.9675   -0.4172    0.0000 C   0  0  0  0  0  0  0  0  0  0  0  0
   -1.6848   -0.0097    0.0000 C   0  0  0  0  0  0  0  0  0  0  0  0
   -1.6905    0.8153    0.0000 O   0  0  0  0  0  0  0  0  0  0  0  0
   -2.4078    1.2229    0.0000 Si  0  0  0  0  0  0  0  0  0  0  0  0
   -2.8154    0.5056    0.0000 C   0  0  0  0  0  0  0  0  0  0  0  0
   -2.3979   -0.2060    0.0000 C   0  0  0  0  0  0  0  0  0  0  0  0
   -2.8055   -0.9233    0.0000 C   0  0  0  0  0  0  0  0  0  0  0  0
   -3.6305   -0.9290    0.0000 C   0  0  0  0  0  0  0  0  0  0  0  0
   -4.0479   -0.2174    0.0000 C   0  0  0  0  0  0  0  0  0  0  0  0
   -3.6403    0.4999    0.0000 C   0  0  0  0  0  0  0  0  0  0  0  0
   -3.1251    1.6304    0.0000 C   0  0  0  0  0  0  0  0  0  0  0  0
   -3.8367    1.2130    0.0000 C   0  0  0  0  0  0  0  0  0  0  0  0
   -3.8424    2.0380    0.0000 C   0  0  0  0  0  0  0  0  0  0  0  0
   -3.1308    2.4554    0.0000 C   0  0  0  0  0  0  0  0  0  0  0  0
   -2.0003    1.9402    0.0000 C   0  0  0  0  0  0  0  0  0  0  0  0
   -2.4177    2.6518    0.0000 C   0  0  0  0  0  0  0  0  0  0  0  0
   -2.0101    3.3691    0.0000 C   0  0  0  0  0  0  0  0  0  0  0  0
   -1.1851    3.3748    0.0000 C   0  0  0  0  0  0  0  0  0  0  0  0
   -0.7677    2.6632    0.0000 C   0  0  0  0  0  0  0  0  0  0  0  0
   -1.1753    1.9459    0.0000 C   0  0  0  0  0  0  0  0  0  0  0  0
  1  2  1  0      
  2  3  1  0      
  2  4  1  0      
  5  4  1  1      
  5  6  1  0      
  6  7  1  1      
  2  7  1  0      
  6  8  1  0      
  8  9  1  6      
  9 10  1  0      
 10 11  1  0      
 11 12  2  0      
 12 13  1  0      
 13 14  2  0      
 14 15  1  0      
 15 16  2  0      
 11 16  1  0      
 16 17  1  0      
 17 18  3  0      
  8 19  1  0      
 19 20  1  6      
 20 21  1  0      
 21 22  1  0      
 22 23  1  0      
 22 24  1  0      
 22 25  1  0      
 21 26  2  0      
 19 27  1  0      
 27 28  1  0      
  5 28  1  0      
 28 29  1  1      
 29 30  1  0      
 30 31  1  0      
 31 32  1  0      
 32 33  2  0      
 33 34  1  0      
 34 35  2  0      
 35 36  1  0      
 36 37  2  0      
 32 37  1  0      
 31 38  1  0      
 38 39  1  0      
 38 40  1  0      
 38 41  1  0      
 31 42  1  0      
 42 43  2  0      
 43 44  1  0      
 44 45  2  0      
 45 46  1  0      
 46 47  2  0      
 42 47  1  0      
M  END
