# Supplementary material for: The intriguing dual-directing effect of 2-cyanobenzyl ether for a highly stereospecific glycosylation reaction
Source: Springer Nature journal article supplement (doi:10.1038/ncomms6051), 2014-10-03
Supplement: 41467_2014_BFncomms6051_MOESM75_ESM.mol [file 41467_2014_BFncomms6051_MOESM75_ESM.mol]

  ChemDraw09191408362D

 46 50  0  0  0  0  0  0  0  0999 V2000
   -1.1895   -3.3746    0.0000 C   0  0  0  0  0  0  0  0  0  0  0  0
   -1.2093   -2.5499    0.0000 C   0  0  0  0  0  0  0  0  0  0  0  0
   -1.9137   -2.9794    0.0000 C   0  0  0  0  0  0  0  0  0  0  0  0
   -1.5629   -1.8045    0.0000 O   0  0  0  0  0  0  0  0  0  0  0  0
   -0.9632   -1.2379    0.0000 C   0  0  0  0  0  0  0  0  0  0  0  0
   -0.2390   -1.6331    0.0000 C   0  0  0  0  0  0  0  0  0  0  0  0
   -0.3911   -2.4439    0.0000 O   0  0  0  0  0  0  0  0  0  0  0  0
    0.4653   -1.2035    0.0000 C   0  0  0  0  0  0  0  0  0  0  0  0
    1.1895   -1.5988    0.0000 O   0  0  0  0  0  0  0  0  0  0  0  0
    1.8939   -1.1692    0.0000 C   0  0  0  0  0  0  0  0  0  0  0  0
    2.6180   -1.5644    0.0000 C   0  0  0  0  0  0  0  0  0  0  0  0
    3.3224   -1.1349    0.0000 C   0  0  0  0  0  0  0  0  0  0  0  0
    4.0466   -1.5301    0.0000 C   0  0  0  0  0  0  0  0  0  0  0  0
    4.0664   -2.3549    0.0000 C   0  0  0  0  0  0  0  0  0  0  0  0
    3.3620   -2.7844    0.0000 C   0  0  0  0  0  0  0  0  0  0  0  0
    2.6378   -2.3892    0.0000 C   0  0  0  0  0  0  0  0  0  0  0  0
    1.9335   -2.8187    0.0000 C   0  0  0  0  0  0  0  0  0  0  0  0
    1.2291   -3.2483    0.0000 N   0  0  0  0  0  0  0  0  0  0  0  0
    0.4455   -0.3788    0.0000 C   0  0  0  0  0  0  0  0  0  0  0  0
    1.1499    0.0508    0.0000 O   0  0  0  0  0  0  0  0  0  0  0  0
    1.1301    0.8755    0.0000 C   0  0  0  0  0  0  0  0  0  0  0  0
    1.8344    1.3051    0.0000 C   0  0  0  0  0  0  0  0  0  0  0  0
    2.5586    0.9098    0.0000 F   0  0  0  0  0  0  0  0  0  0  0  0
    2.5388    1.7346    0.0000 F   0  0  0  0  0  0  0  0  0  0  0  0
    1.8146    2.1298    0.0000 F   0  0  0  0  0  0  0  0  0  0  0  0
   -0.2787    0.0164    0.0000 O   0  0  0  0  0  0  0  0  0  0  0  0
   -0.9830   -0.4131    0.0000 C   0  0  0  0  0  0  0  0  0  0  0  0
   -1.7072   -0.0179    0.0000 C   0  0  0  0  0  0  0  0  0  0  0  0
   -1.7270    0.8069    0.0000 O   0  0  0  0  0  0  0  0  0  0  0  0
   -2.4512    1.2021    0.0000 Si  0  0  0  0  0  0  0  0  0  0  0  0
   -2.8464    0.4779    0.0000 C   0  0  0  0  0  0  0  0  0  0  0  0
   -2.4169   -0.2264    0.0000 C   0  0  0  0  0  0  0  0  0  0  0  0
   -2.8121   -0.9506    0.0000 C   0  0  0  0  0  0  0  0  0  0  0  0
   -3.6368   -0.9704    0.0000 C   0  0  0  0  0  0  0  0  0  0  0  0
   -4.0664   -0.2661    0.0000 C   0  0  0  0  0  0  0  0  0  0  0  0
   -3.6712    0.4581    0.0000 C   0  0  0  0  0  0  0  0  0  0  0  0
   -3.1753    1.5973    0.0000 C   0  0  0  0  0  0  0  0  0  0  0  0
   -3.8797    1.1678    0.0000 C   0  0  0  0  0  0  0  0  0  0  0  0
   -3.8995    1.9925    0.0000 C   0  0  0  0  0  0  0  0  0  0  0  0
   -3.1952    2.4221    0.0000 C   0  0  0  0  0  0  0  0  0  0  0  0
   -2.0559    1.9263    0.0000 C   0  0  0  0  0  0  0  0  0  0  0  0
   -2.4855    2.6306    0.0000 C   0  0  0  0  0  0  0  0  0  0  0  0
   -2.0903    3.3548    0.0000 C   0  0  0  0  0  0  0  0  0  0  0  0
   -1.2655    3.3746    0.0000 C   0  0  0  0  0  0  0  0  0  0  0  0
   -0.8360    2.6703    0.0000 C   0  0  0  0  0  0  0  0  0  0  0  0
   -1.2312    1.9461    0.0000 C   0  0  0  0  0  0  0  0  0  0  0  0
  1  2  1  0      
  2  3  1  0      
  2  4  1  0      
  5  4  1  1      
  5  6  1  0      
  6  7  1  1      
  2  7  1  0      
  6  8  1  0      
  8  9  1  6      
  9 10  1  0      
 10 11  1  0      
 11 12  2  0      
 12 13  1  0      
 13 14  2  0      
 14 15  1  0      
 15 16  2  0      
 11 16  1  0      
 16 17  1  0      
 17 18  3  0      
  8 19  1  0      
 19 20  1  6      
 20 21  1  0      
 21 22  1  0      
 22 23  1  0      
 22 24  1  0      
 22 25  1  0      
 19 26  1  0      
 26 27  1  0      
  5 27  1  0      
 27 28  1  1      
 28 29  1  0      
 29 30  1  0      
 30 31  1  0      
 31 32  2  0      
 32 33  1  0      
 33 34  2  0      
 34 35  1  0      
 35 36  2  0      
 31 36  1  0      
 30 37  1  0      
 37 38  1  0      
 37 39  1  0      
 37 40  1  0      
 30 41  1  0      
 41 42  2  0      
 42 43  1  0      
 43 44  2  0      
 44 45  1  0      
 45 46  2  0      
 41 46  1  0      
M  END
